# Supplementary material for: Lignin-Based Nanoparticles as Both Structural and Active Elements in Self-Assembling and Self-Healing Multifunctional Hydrogels for Chronic Wound Management
Source: MDPI journal article supplement (doi:10.3390/pharmaceutics14122658), 2022-11-30
Supplement: s1 [file s1]

## Supplementary Material

### Lignin-based nanoparticles as both structural and active elements in self-assembling and self-healing multifunctional hydrogels for chronic wound management

A. Gala Morena, Sílvia Pérez-Rafael, Tzanko Tzanov\*

Group of Molecular and Industrial Biotechnology, Departament d'Enginyeria Química,  
Universitat Politècnica de Catalunya, Rambla Sant Nebridi 22, 08222 Terrassa, Spain

\*Corresponding author, email: [tzanko.tzanov@upc.edu](mailto:tzanko.tzanov@upc.edu)

**Table S1.** Characterization of phenolated lignin nanoparticles (PLN): hydrodynamic size (nm), polydispersity index (PDI),  $\zeta$ -potential (mV), and phenolic content (mg gallic acid equivalents, GAE per gram of sample).

| Hydrodynamic size | PDI   | $\zeta$ -potential | Phenolic content                |
|-------------------|-------|--------------------|---------------------------------|
| 277.7 nm          | 0.265 | −26.4 mV           | 325 ± 26 mg GAE·g <sup>−1</sup> |

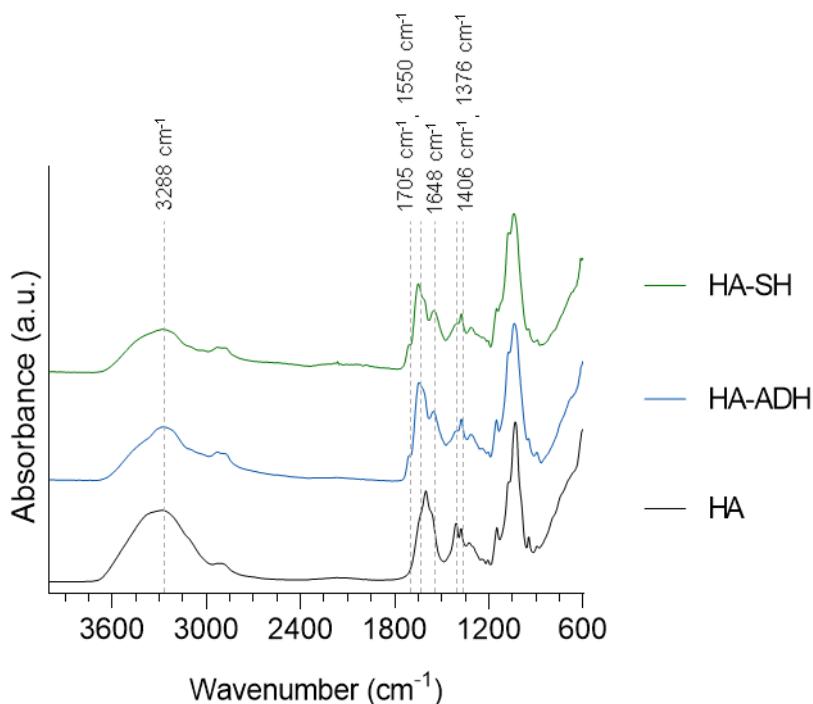

**Figure S1.** FTIR spectra of unmodified hyaluronic acid (HA), HA modified with adipic acid dihydrazide (HA-ADH) and thiolated HA (HA-SH).

**Table S2.** Storage modulus ( $G'$ ), loss modulus ( $G''$ ) and damping factor ( $\tan \delta$ ) values at 1 % shear strain of different hydrogel formulations and polymer mixtures (controls).

| Hydrogel sample           | $G'$ (Pa) | $G''$ (Pa) | $\tan \delta$ |
|---------------------------|-----------|------------|---------------|
| HA-SH, SF, PLN_1.5%_20    | 102.13    | 12.70      | 0.124         |
| HA-SH, SF, PLN_1.5%_10    | 77.68     | 13.84      | 0.178         |
| HA-SH, SF, PLN_1.5%_5     | 59.68     | 12.63      | 0.212         |
| Control 1.5 % (HA-SH, SF) | 8.6       | 3.32       | 0.385         |
| HA-SH, SF, PLN_1.0%_20    | 66.70     | 9.67       | 0.145         |
| HA-SH, SF, PLN_1.0%_10    | 34.73     | 5.82       | 0.168         |
| HA-SH, SF, PLN_1.0%_5     | 30.34     | 5.92       | 0.195         |
| Control 1.0 % (HA-SH, SF) | 4.65      | 2.05       | 0.442         |

**Table S3.** Flow point or shear strain value (%) at which the hydrogel does not follow a gel-like behavior ( $G' < G''$ ).

| Hydrogel sample        | Flow point (%) |
|------------------------|----------------|
| HA-SH, SF, PLN_1.5%_20 | 564            |
| HA-SH, SF, PLN_1.5%_10 | 917            |
| HA-SH, SF, PLN_1.5%_5  | 149            |
| HA-SH, SF, PLN_1.0%_20 | 917            |
| HA-SH, SF, PLN_1.0%_10 | 1490           |
| HA-SH, SF, PLN_1.0%_5  | 1900           |

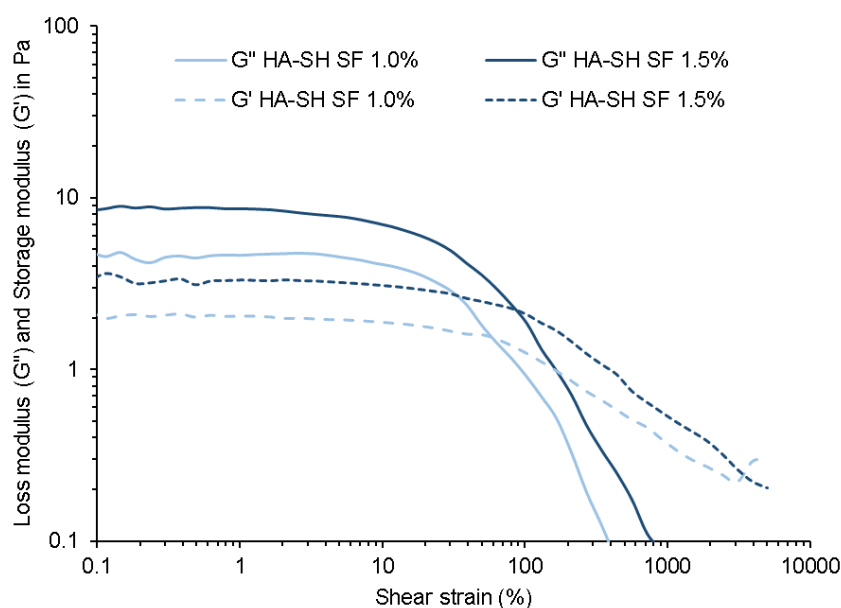

**Figure S2.** Strain-dependent oscillatory tests performed at  $1 \text{ s}^{-1}$  and  $25 \text{ }^{\circ}\text{C}$  of mixtures containing a mixture of HA-SH and SF at 1.0 and 1.5 % after 2 h incubation at  $37 \text{ }^{\circ}\text{C}$ .

**Table S4.** Viscosity values of hydrogels at  $0.1 \text{ s}^{-1}$  and  $1.0 \text{ s}^{-1}$  shear rate.

| Hydrogel sample         | Viscosity ( $\text{Pa}\cdot\text{s}$ ) at $0.1 \text{ s}^{-1}$ | Viscosity ( $\text{Pa}\cdot\text{s}$ ) at $1.0 \text{ s}^{-1}$ |
|-------------------------|----------------------------------------------------------------|----------------------------------------------------------------|
| HA-SH, SF, PLN _1.5%_20 | 1552.2                                                         | 88.3                                                           |
| HA-SH, SF, PLN _1.5%_10 | 812.3                                                          | 49.9                                                           |
| HA-SH, SF, PLN _1.5%_5  | 321.9                                                          | 35.8                                                           |
| HA-SH, SF, PLN _1.0%_20 | 798.7                                                          | 64.0                                                           |
| HA-SH, SF, PLN _1.0%_10 | 658.5                                                          | 46.4                                                           |
| HA-SH, SF, PLN _1.0%_5  | 445.7                                                          | 31.5                                                           |

**Table S5.** Stability of the hydrogels in PBS at  $37 \text{ }^{\circ}\text{C}$ . Dry mass (mg) of samples 1.0%\_10 at time 0, 1, 3 and 7 days, and statistical significance assessed using a multiple comparison one-way ANOVA test against time 0. Results are reported as the mean of five replicates  $\pm$  standard deviation (SD).

| Time (days)                              | 0              | 1               | 3              | 7             |
|------------------------------------------|----------------|-----------------|----------------|---------------|
| Dry mass (mg)                            | $10.2 \pm 0.6$ | $11.2 \pm 0.3$  | $10.8 \pm 1.0$ | $9.8 \pm 0.6$ |
| Statistical significance (One-way ANOVA) |                | ns <sup>a</sup> | ns             | ns            |

<sup>a</sup>ns = not significant

**Table S6.** Hydrogel stability and PLN release in response to hyaluronidase. The stability was reported as dry mass (mg) of the 1.0%\_10 hydrogel at time 0 and 24 h with hyaluronidase or buffer, and the statistical significance was assessed using a multiple comparison one-way ANOVA test against time 0. PLN release is reported as fluorescence units (F.U.) measured in the supernatant. All results are reported as mean values ( $n = 4$ )  $\pm$  SD.

| Time (h)                                         | 0             | 24              |                |
|--------------------------------------------------|---------------|-----------------|----------------|
|                                                  |               | Hyaluronidase   | Buffer         |
| Dry mass (mg)                                    | 8.4 $\pm$ 0.1 | 8.0 $\pm$ 0.5   | 8.6 $\pm$ 0.4  |
| Dry mass statistical significant (One-way ANOVA) |               | ns <sup>a</sup> | ns             |
| Fluorescence (F.U.)                              | 0             | 3234 $\pm$ 497  | 1932 $\pm$ 375 |

<sup>a</sup>ns = not significant

**Table S7.** Statistical significance of the MPO and MMPs inhibition capacity of the hydrogels assessed using a multiple comparison one-way ANOVA followed by Dunnett's post-hoc test.

|                        | Mean difference | 95 % confidence interval | Significant          | Adjusted p-value |
|------------------------|-----------------|--------------------------|----------------------|------------------|
| <b>MPO inhibition</b>  |                 |                          |                      |                  |
| Control vs. 1.5%_20    | - 32.24         | -42.97 to -21.52         | Yes (****)           | <0.0001          |
| Control vs. 1.5%_10    | -19.78          | -29.66 to -9.906         | Yes (****)           | <0.0001          |
| Control vs. 1.5%_5     | -6.261          | -16.14 to 3.618          | No (ns) <sup>a</sup> | 0.3662           |
| Control vs. 1.0%_20    | -34.48          | -44.87 to -24.09         | Yes (****)           | <0.0001          |
| Control vs. 1.0%_10    | -28.48          | -38.59 to -18.37         | Yes (****)           | <0.0001          |
| Control vs. 1.0%_5     | -22.86          | -33.59 to -12.13         | Yes (****)           | <0.0001          |
| <b>MMPs inhibition</b> |                 |                          |                      |                  |
| Control vs. 1.5%_20    | -36.46          | -48.07 to -24.84         | Yes (****)           | <0.0001          |
| Control vs. 1.5%_10    | -27.34          | -38.96 to -15.73         | Yes (****)           | <0.0001          |
| Control vs. 1.5%_5     | -22.66          | -34.27 to -11.04         | Yes (***)            | 0.0001           |
| Control vs. 1.0%_20    | -51.56          | -63.18 to -39.95         | Yes (****)           | <0.0001          |
| Control vs. 1.0%_10    | -36.72          | -48.33 to -25.10         | Yes (****)           | <0.0001          |
| Control vs. 1.0%_5     | -25.26          | -36.88 to -13.64         | Yes (****)           | <0.0001          |

<sup>a</sup>ns = not significant
